# Supplementary material for: Measurement of gene amplifications related to drug resistance in Plasmodium falciparum using droplet digital PCR
Source: Malar J. 2021 Feb 28;20:120. doi: 10.1186/s12936-021-03659-5 (PMC7916280; doi:10.1186/s12936-021-03659-5)
Supplement: Supplementary file 3 — Additional file 3. Genes copy number of P. falciparum reference strains estimated by ddPCR and qPCR assays. [file 12936_2021_3659_MOESM3_ESM.xlsx]

## Sheet: Sheet1
No.	Samples	pfmdr1 CNVs
		ddPCR
		ddPCR (Rep1)	ddPCR (Rep2)	ddPCR (Rep3)	ddPCR (Rep4)	Mean	SD
1	P. falciparum 3D7	0.96868	0.958	0.981	1.04	0.98692	0.0366133
2	P. falciparum 7G8	0.919488	0.944	0.856	0.946	0.916372	0.0420143
3	P. falciparum D10	0.935714	0.923	0.868	0.906	0.908179	0.029422
4	P. falciparum D6	0.980564	0.969	0.947	0.966	0.965641	0.0139234
5	P. falciparum DD2	2.69231	2.84	2.66	2.73	2.73058	0.0783568
6	P. falciparum HB3	1.17143	1.196	1.168	1.062	1.14936	0.0595582
7	P. falciparum W2	1.01326	1.092	0.945	1.104	1.03856	0.0742338
No.	Samples	pfplasmepsin2 CNVs
		ddPCR
		ddPCR (Rep1)	ddPCR (Rep2)	ddPCR (Rep3)	ddPCR (Rep4)	Mean	SD
1	P. falciparum 3D7	0.911828	0.825	0.877	0.813	0.856707	0.0460643
2	P. falciparum 7G8	0.932543	0.892	0.88	0.885	0.897386	0.0239495
3	P. falciparum D10	0.838256	0.819	0.814	0.821	0.823064	0.0105472
4	P. falciparum D6	0.919125	0.898	0.895	0.905	0.904281	0.0107461
5	P. falciparum DD2	0.952743	0.973	0.962	0.941	0.957186	0.0136013
6	P. falciparum HB3	1.11348	1.112	1.029	1.192	1.11162	0.0665597
7	P. falciparum W2	1.03304	0.999	1	1.069	1.02526	0.033173
No.	Samples	pfgch1 CNVs
		ddPCR
		ddPCR (Rep1)	ddPCR (Rep2)	ddPCR (Rep3)	ddPCR (Rep4)	Mean	SD
1	P. falciparum 3D7	1.67698	1.61	1.59	1.62	1.62424	0.037303
2	P. falciparum 7G8	2.93622	2.92	3.03	2.96	2.96156	0.0484965
3	P. falciparum D10	1.73383	1.67	1.75	1.66	1.70346	0.0450793
4	P. falciparum D6	0.972678	0.96	0.95	0.95	0.958169	0.0107598
5	P. falciparum DD2	1.67626	1.7	1.68	1.7	1.68906	0.012719
6	P. falciparum HB3	1.97354	2.14	2.05	2.09	2.06339	0.0703055
7	P. falciparum W2	1.94126	1.89	1.93	1.86	1.90532	0.0373695
